# Supplementary material
Source: PubMed Central journal article supplement (PMC3133913)
Supplement: supp_138.15.3213_DEV058693TableS1.pdf [file supp_138.15.3213_DEV058693TableS1.pdf]

**Table S1. qRT-PCR primer and probe sequences**

| Gene symbol                   | Forward primer (5'-3') | Reverse primer (5'-3') | Probe (5'-3')           |
|-------------------------------|------------------------|------------------------|-------------------------|
| <b>Mouse</b>                  |                        |                        |                         |
| <i>Ngn3</i>                   | GACGCCAAACTTACAAAG     | GTCAGTGCCAGATGT        | CCTGCGCTTCGCCACAAC      |
| cyclophilin B ( <i>Ppib</i> ) | GCAAAGTTCTAGAGGGCATGGA | CCCGGCTGTCTGTCTTGGT    | TGGTACGGAAGGTGGAG       |
| <b>Zebrafish</b>              |                        |                        |                         |
| $\beta$ -actin                | CATCAGGGTGTCATGGTTGGT  | TCTCTTGCTCTGAGCCTCATCA | TGGGACAGAAAGACAGCTA     |
| <i>cp</i>                     | GCTCCAGCGGTAAAAACCT    | CGCGCGGCTTCATCTT       | ATCAGAACAAAACCG         |
| <i>ghrelin</i>                | TCCTCAGTCCGACTCAGAAACC | GCTTCTTCTGCCACTCTTG    | AGGGTCGAAGGCCA          |
| <i>glucagon</i>               | AAGCGAGGAGACGATCCAAA   | TCCAACACACACCAGCAAATG  | ACATTTTCATATCATCTCATCC  |
| <i>hhex</i>                   | GGCGGCCAGGTTTCGAT      | CGAACTTCTTCTCCAGCTCGAT | CTCCAACGATCAAAC         |
| <i>insulin</i>                | GAGCCCCTTCTGGGTTTCC    | AAGTCAGCCACCTCAGTTTCTT | TCCTCCTAAATCTGCC        |
| <i>nkx2.2a</i>                | AACCACGGACAGCATCCAAT   | TTTGCGGACGTGTCTTGAGA   | TCATTACACGGCCTGTCCGCGAA |
| <i>pdx1</i>                   | CACACGCACGCATGGAAA     | TCCTCGGCCTCGACCATAT    | CAGTGGACAGGCCCT         |
| <i>prox1</i>                  | CGTGCTCTCAACATGCACTACA | GGAATCGCTCCGGAACCT     | AAGGCCAACGATTTT         |
| <i>somatostatin</i>           | GCCAAACTCCGCCAACTTC    | CTGGCGAGTTCCTGTTTTCC   | ATCTCTCCTCAGCCCTG       |
